# Supplementary material
Source: Elsevier journal article supplement (https://www.sciencedirect.com/science/article/pii/S0300289623000285)
Supplement: mmc1 [file S0300289623000285:mmc1.pdf]

## Material Suplementario

Rafael Dal-Ré

**Los investigadores olvidan informar sobre cómo compartir los datos de los estudios publicados en revistas españolas de medicina**

|                                                                                                                                                                       |       |
|-----------------------------------------------------------------------------------------------------------------------------------------------------------------------|-------|
| A.- Revistas españolas con un factor de impacto (JCR 2021) superior a 1 que se han revisado para este trabajo                                                         | Pag 2 |
| B.- Revistas españolas incluidas en el listado de revistas que se han adherido a las recomendaciones del ICMJE.<br>Disponibilidad de datos del estudio para terceros. | Pag 3 |
| C.- Datos individuales de los artículos revisados de las 6 revistas objeto del análisis y de tres revistas de 'control'.                                              | Pag 7 |

**A.-** Revistas españolas con un factor de impacto (JCR 2021) superior a 1 que se han revisado para este trabajo, y si están o no incluidas en el listado de revistas que se han adherido a las Recomendaciones del ICMJE y, entre estas, si tienen un apartado sobre 'depósito y enlace de datos'. En negrita las revistas que cumplen con los tres requisitos y que han sido objeto del análisis de este trabajo. Datos obtenidos el 5 de enero de 2023.

| <i>Revista</i>                       | <i>FI 2021</i> | <i>ICMJE <sup>a</sup></i> | <i>Depósito <sup>b</sup></i> | <i>Revista</i>                                               | <i>FI, 2021</i> | <i>ICMJE <sup>a</sup></i> | <i>Depósito <sup>b</sup></i> |
|--------------------------------------|----------------|---------------------------|------------------------------|--------------------------------------------------------------|-----------------|---------------------------|------------------------------|
| Actas Españolas de Psiquiatría       | 1.681          | No                        | –                            | Allergologia et Immunopathologia                             | 2.094           | No                        | –                            |
| Anales de Pediatría                  | 2.377          | Si                        | no                           | <b>Archivos de Bronconeumología</b>                          | <b>6.333</b>    | <b>Si</b>                 | <b>si</b>                    |
| <b>Atención Primaria</b>             | <b>2.206</b>   | <b>Si</b>                 | <b>si</b>                    | Cirugía Española                                             | 2.242           | No                        | –                            |
| Clinical and Translational Oncology  | 3.34           | No                        | –                            | Emergencias                                                  | 5.345           | No                        | –                            |
| Endocrinología, Diabetes y Nutrición | 1.833          | No                        | –                            | <b>Enfermedades Infecciosas y Microbiología Clínica</b>      | <b>1.994</b>    | <b>Si</b>                 | <b>si</b>                    |
| <b>Gaceta Sanitaria</b>              | <b>2.479</b>   | <b>Si</b>                 | <b>si</b>                    | Journal of Investigational Allergology & Clinical Immunology | 8.185           | Si                        | no                           |
| Medicina Clínica                     | 3.2            | Si                        | no                           | <b>Medicina Intensiva</b>                                    | <b>2.799</b>    | <b>Si</b>                 | <b>si</b>                    |
| Nefrología                           | 3.084          | No                        | –                            | Neurología                                                   | 5.486           | No                        | –                            |
| Revista Clínica Española             | 3.064          | Si                        | no                           | Revista Española de Enfermedades Digestivas                  | 2.389           | Si                        | no                           |
| Revista Española de Cardiología      | 6.975          | Si                        | no                           | Revista Española de Medicina Nuclear                         | 1,247           | No                        | –                            |
| Revista Española de Quimioterapia    | 2.515          | Si                        | no                           | Revista Española de Salud Publica                            | 1.333           | Si                        | no                           |
| <b>Revista de Neurología</b>         | <b>1.235</b>   | <b>Si</b>                 | <b>si</b>                    | Revista de Psiquiatría y Salud Mental                        | 6.795           | No                        | –                            |

(a) Incluida en el listado de revistas adheridas a las Recomendaciones del ICMJE; (b) Revista que incluye en las Instrucciones para los autores un apartado sobre Depósito y enlace de datos (del estudio publicado). Sólo se comprobó si tenían este apartado en las que estaban en la lista del ICMJE

**B.-** Revistas españolas incluidas en el listado de revistas que se han adherido a las recomendaciones del ICMJE. Disponibilidad de datos del estudio para terceros. Datos obtenidos el 5 de enero de 2023.

| Revista                      | Obliga a mencionar la disponibilidad de datos del estudio                                                                                                                                                                                                                                                                                                                                                                                                                                                                                                                                                                                                                                                                                                                                                                                                                                                                                                                                                                                                                                                                                                                                                                                                                                                                                                                                                                                                                                                                                                                                                                                                                                                                                                                                                                                                                                                                                                                                                                                                                                                                                                                                                                                                      |  |
|------------------------------|----------------------------------------------------------------------------------------------------------------------------------------------------------------------------------------------------------------------------------------------------------------------------------------------------------------------------------------------------------------------------------------------------------------------------------------------------------------------------------------------------------------------------------------------------------------------------------------------------------------------------------------------------------------------------------------------------------------------------------------------------------------------------------------------------------------------------------------------------------------------------------------------------------------------------------------------------------------------------------------------------------------------------------------------------------------------------------------------------------------------------------------------------------------------------------------------------------------------------------------------------------------------------------------------------------------------------------------------------------------------------------------------------------------------------------------------------------------------------------------------------------------------------------------------------------------------------------------------------------------------------------------------------------------------------------------------------------------------------------------------------------------------------------------------------------------------------------------------------------------------------------------------------------------------------------------------------------------------------------------------------------------------------------------------------------------------------------------------------------------------------------------------------------------------------------------------------------------------------------------------------------------|--|
| Anales de Pediatría          | No                                                                                                                                                                                                                                                                                                                                                                                                                                                                                                                                                                                                                                                                                                                                                                                                                                                                                                                                                                                                                                                                                                                                                                                                                                                                                                                                                                                                                                                                                                                                                                                                                                                                                                                                                                                                                                                                                                                                                                                                                                                                                                                                                                                                                                                             |  |
| Archivos de Bronconeumología | <p><u>Research data</u></p> <p>This journal encourages and enables you to share data that supports your research publication where appropriate, and enables you to interlink the data with your published articles. Research data refers to the results of observations or experimentation that validate research findings. To facilitate reproducibility and data reuse, this journal also encourages you to share your software, code, models, algorithms, protocols, methods and other useful materials related to the project.</p> <p>Below are a number of ways in which you can associate data with your article or make a statement about the availability of your data when submitting your manuscript. If you are sharing data in one of these ways, you are encouraged to cite the data in your manuscript and reference list. Please refer to the "References" section for more information about data citation. For more information on depositing, sharing and using research data and other relevant research materials, visit the <a href="#">research data</a> page.</p> <p><i>Data in Brief</i></p> <p>You have the option of converting any or all parts of your supplementary or additional raw data into a data article published in <i>Data in Brief</i>. A data article is a new kind of article that ensures that your data are actively reviewed, curated, formatted, indexed, given a DOI and made publicly available to all upon publication (watch this <a href="#">video</a> describing the benefits of publishing your data in <i>Data in Brief</i>). You are encouraged to submit your data article for <i>Data in Brief</i> as an additional item directly alongside the revised version of your manuscript. If your research article is accepted, your data article will automatically be transferred over to <i>Data in Brief</i> where it will be editorially reviewed, published open access and linked to your research article on ScienceDirect. Please note an <a href="#">open access fee</a> is payable for publication in <i>Data in Brief</i>. Full details can be found on the <a href="#">Data in Brief website</a>. Please use <a href="#">this template</a> to write your <i>Data in Brief</i> data article.</p> |  |
| Atención Primaria            | <p><u>Depósito y enlace de datos</u></p> <p>Elsevier anima y ayuda a los autores a compartir los datos en bruto subyacentes al trabajo de investigación que se publica siempre que sea apropiado y, con este fin, permite el enlace online de artículos y datos. <a href="#">Más información sobre como depositar, compartir y utilizar de datos de investigación.</a></p>                                                                                                                                                                                                                                                                                                                                                                                                                                                                                                                                                                                                                                                                                                                                                                                                                                                                                                                                                                                                                                                                                                                                                                                                                                                                                                                                                                                                                                                                                                                                                                                                                                                                                                                                                                                                                                                                                     |  |

|                                                                 |                                                                                                                                                                                                                                                                                                                                                                                                                                                                                                                                                                                                                                                                                                                                                                                                                                                                                                                                                                                                                                                                                                                                                                                                                                                                                                                                                                                                                                                                                                                                                                                                                                                                                                                                                                                                                                                                                                                                                                                                                                                                                                                                                                                                                                                                                                                                                                                     |
|-----------------------------------------------------------------|-------------------------------------------------------------------------------------------------------------------------------------------------------------------------------------------------------------------------------------------------------------------------------------------------------------------------------------------------------------------------------------------------------------------------------------------------------------------------------------------------------------------------------------------------------------------------------------------------------------------------------------------------------------------------------------------------------------------------------------------------------------------------------------------------------------------------------------------------------------------------------------------------------------------------------------------------------------------------------------------------------------------------------------------------------------------------------------------------------------------------------------------------------------------------------------------------------------------------------------------------------------------------------------------------------------------------------------------------------------------------------------------------------------------------------------------------------------------------------------------------------------------------------------------------------------------------------------------------------------------------------------------------------------------------------------------------------------------------------------------------------------------------------------------------------------------------------------------------------------------------------------------------------------------------------------------------------------------------------------------------------------------------------------------------------------------------------------------------------------------------------------------------------------------------------------------------------------------------------------------------------------------------------------------------------------------------------------------------------------------------------------|
| <p>Enfermedades<br/>Infecciosas y<br/>Microbiología Clínica</p> | <p><u>Datos científicos</u></p> <p>La revista recomienda compartir los datos que los autores han utilizado en su trabajo de investigación, cuando sea procedente, y permite la realización de enlaces con los artículos publicados. Por datos científicos entendemos los resultados de las observaciones o experimentos que validan los hallazgos realizados. Con el fin de facilitar la reproducibilidad de la investigación y la reutilización de datos, la revista recomienda también compartir código, tipo de software, modelos, algoritmos, protocolos, métodos y cualquier otro material útil relacionado con el proyecto.</p> <p>A continuación encontrará distintas opciones para asociar datos con su artículo o bien para hacer una declaración sobre la disponibilidad de los mismos durante el envío de su manuscrito. Cuando elija alguna opción de compartición de datos, no olvide incorporar la cita correspondiente tanto en el manuscrito como en la bibliografía. En el apartado ¿Bibliografía¿ encontrará información sobre la citación de datos. Puede obtener más información sobre como depositar, compartir y utilizar datos u otros materiales científicos relevantes en la página <a href="#">datos científicos</a>.</p> <p><u>Enlaces a datos online</u></p> <p>Si ha depositado los datos científicos de su trabajo en un repositorio de datos, puede enlazar su artículo directamente con dicho repositorio. Elsevier colabora con varios repositorios para enlazar los artículos publicados en ScienceDirect con la finalidad de que los usuarios tengan acceso a los datos utilizados en el trabajo y conseguir una mejor comprensión de la investigación que el artículo describe.</p> <p>Existen distintas formas de enlazar los datos en su artículo. Para hacerlo, debe incluir la información relevante en el sistema de envío de manuscritos. Encontrará más información en la página <a href="#">enlaces a bases de datos online</a>.</p> <p>Si utiliza los <a href="#">repositorios reconocidos de bases de datos</a>, el banner del repositorio enlazado aparecerá automáticamente en el artículo publicado en ScienceDirect.</p> <p>Además, puede enlazar con datos o entidades utilizando identificadores en el texto del manuscrito mediante el formato siguiente: Database: xxxx (p.e., TAIR: AT1G01020; CCDC: 734053; PDB: 1XFN).</p> |
| <p>Gaceta Sanitaria</p>                                         | <p><u>Disponibilidad de bases de datos y material para réplica</u></p> <p>Gaceta Sanitaria apoya el acceso abierto a los datos de investigación y anima a las personas autoras a compartir los materiales requeridos para su estudio, por ejemplo, las bases de datos o el código para el análisis. Al final del manuscrito las personas autoras deberán indicar el método elegido para compartir sus materiales, existiendo las siguientes fórmulas:</p> <p><i>Depósito de datos (muy recomendado)</i></p> <p>Las bases de datos y otro material se depositan en un repositorio público. En el apartado Métodos se debe indicar el nombre y enlace del repositorio junto con los identificadores de objetos digitales (DOI). Se recomienda el uso de Mendeley Data (<a href="https://data.mendeley.com/">https://data.mendeley.com/</a>).</p> <p><i>Datos en archivos suplementarios</i></p> <p>En el caso de conjuntos de pocos datos, se pueden adjuntar como archivos suplementarios. Se debe tener cuidado de maximizar la accesibilidad y reutilización de los datos seleccionando un formato de archivo desde el cual se puedan extraer los mismos de manera eficiente (por ejemplo, las hojas de cálculo son preferibles a PDF para los datos tabulados).</p> <p>Esta misma vía deberá utilizarse para adjuntar los códigos utilizados en el estudio indicando el programa informático utilizado (SPSS, Stata, R, etc.) y versión. Los códigos deberán ir acompañados de una breve descripción en formato .txt que facilite la réplica de los análisis. Si la provisión de datos presenta problemas éticos o legales, los siguientes métodos pueden ser alternativas aceptables:</p>                                                                                                                                                                                                                                                                                                                                                                                                                                                                                                                                                                                                                                                                                        |

|                                                                |                                                                                                                                                                                                                                                                                                                                                                                                                                                                                                                                                                                                                                                                                                                                                                                                                                                                                                                                                                                                                                                                                                                                                                                                                                                                                                                                                                                                                                                                                                                                                                                                                                                                                                                                                                                                                                                                                                                                                                                                                                                                                                                                                                                                                                                                           |  |
|----------------------------------------------------------------|---------------------------------------------------------------------------------------------------------------------------------------------------------------------------------------------------------------------------------------------------------------------------------------------------------------------------------------------------------------------------------------------------------------------------------------------------------------------------------------------------------------------------------------------------------------------------------------------------------------------------------------------------------------------------------------------------------------------------------------------------------------------------------------------------------------------------------------------------------------------------------------------------------------------------------------------------------------------------------------------------------------------------------------------------------------------------------------------------------------------------------------------------------------------------------------------------------------------------------------------------------------------------------------------------------------------------------------------------------------------------------------------------------------------------------------------------------------------------------------------------------------------------------------------------------------------------------------------------------------------------------------------------------------------------------------------------------------------------------------------------------------------------------------------------------------------------------------------------------------------------------------------------------------------------------------------------------------------------------------------------------------------------------------------------------------------------------------------------------------------------------------------------------------------------------------------------------------------------------------------------------------------------|--|
|                                                                | <p><i>Datos puestos a disposición de las personas que lo soliciten</i><br/>En este caso se debe especificar “Datos disponibles a petición” e identificar el grupo y datos de contacto al que deben enviarse las solicitudes. También se deben especificar los motivos de las restricciones al depósito de datos públicos.</p> <p><i>Datos disponibles de un tercero</i><br/>Si las personas autoras no son propietarias de los datos, se debe incluir la información de contacto o enlaces necesarios para que la persona interesada pueda solicitarlos.</p>                                                                                                                                                                                                                                                                                                                                                                                                                                                                                                                                                                                                                                                                                                                                                                                                                                                                                                                                                                                                                                                                                                                                                                                                                                                                                                                                                                                                                                                                                                                                                                                                                                                                                                              |  |
| Journal of Investigational Allergology and Clinical Immunology | No                                                                                                                                                                                                                                                                                                                                                                                                                                                                                                                                                                                                                                                                                                                                                                                                                                                                                                                                                                                                                                                                                                                                                                                                                                                                                                                                                                                                                                                                                                                                                                                                                                                                                                                                                                                                                                                                                                                                                                                                                                                                                                                                                                                                                                                                        |  |
| Medicina Clínica                                               | No                                                                                                                                                                                                                                                                                                                                                                                                                                                                                                                                                                                                                                                                                                                                                                                                                                                                                                                                                                                                                                                                                                                                                                                                                                                                                                                                                                                                                                                                                                                                                                                                                                                                                                                                                                                                                                                                                                                                                                                                                                                                                                                                                                                                                                                                        |  |
| Medicina Intensiva                                             | <p><u>Datos científicos</u><br/>La revista recomienda compartir los datos que los autores han utilizado en su trabajo de investigación, cuando sea procedente, y permite la realización de enlaces con los artículos publicados. Por datos científicos entendemos los resultados de las observaciones o experimentos que validan los hallazgos realizados. Con el fin de facilitar la reproducibilidad de la investigación y la reutilización de datos, la revista recomienda también compartir código, tipo de software, modelos, algoritmos, protocolos, métodos y cualquier otro material útil relacionado con el proyecto.<br/>A continuación encontrará distintas opciones para asociar datos con su artículo o bien para hacer una declaración sobre la disponibilidad de los mismos durante el envío de su manuscrito. Cuando elija alguna opción de compartición de datos, no olvide incorporar la cita correspondiente tanto en el manuscrito como en la bibliografía. En el apartado “Bibliografía” encontrará información sobre la citación de datos. Puede obtener más información sobre como depositar, compartir y utilizar datos u otros materiales científicos relevantes en la página <a href="#">datos científicos</a>.</p> <p><i>Enlaces de datos online</i><br/>Si ha depositado los datos científicos de su trabajo en un repositorio de datos, puede enlazar su artículo directamente con dicho repositorio. Elsevier colabora con varios repositorios para enlazar los artículos publicados en Science Direct con la finalidad de que los usuarios tengan acceso a los datos utilizados en el trabajo y conseguir una mejor comprensión de la investigación que el artículo describe.<br/>Existen distintas formas de enlazar los datos en su artículo. Para hacerlo, debe incluir la información relevante en el sistema de envío de manuscritos. Encontrará más información en la página <a href="#">enlaces a bases de datos online</a>.<br/>Si utiliza los <a href="#">repositorios reconocidos de bases de datos</a>, el banner del repositorio enlazado aparecerá automáticamente en el artículo publicado en Science Direct. Además, puede enlazar con datos o entidades utilizando identificadores en el texto del manuscrito mediante</p> |  |
| Revista Clínica Española                                       | No                                                                                                                                                                                                                                                                                                                                                                                                                                                                                                                                                                                                                                                                                                                                                                                                                                                                                                                                                                                                                                                                                                                                                                                                                                                                                                                                                                                                                                                                                                                                                                                                                                                                                                                                                                                                                                                                                                                                                                                                                                                                                                                                                                                                                                                                        |  |

|                                             |                                                                                                                                                                                                                                                                                                                                                                                                                                                                                                                                                                                                                                                                                                                                                                                                                                                                                                                                                                                                                                                                                                                                                                                                                                                                                                                                                                                                                                                                                                                                                                                                                                                                                                                                                                                                                                                                                                                                                                                                                                                                                                                                                                                        |  |
|---------------------------------------------|----------------------------------------------------------------------------------------------------------------------------------------------------------------------------------------------------------------------------------------------------------------------------------------------------------------------------------------------------------------------------------------------------------------------------------------------------------------------------------------------------------------------------------------------------------------------------------------------------------------------------------------------------------------------------------------------------------------------------------------------------------------------------------------------------------------------------------------------------------------------------------------------------------------------------------------------------------------------------------------------------------------------------------------------------------------------------------------------------------------------------------------------------------------------------------------------------------------------------------------------------------------------------------------------------------------------------------------------------------------------------------------------------------------------------------------------------------------------------------------------------------------------------------------------------------------------------------------------------------------------------------------------------------------------------------------------------------------------------------------------------------------------------------------------------------------------------------------------------------------------------------------------------------------------------------------------------------------------------------------------------------------------------------------------------------------------------------------------------------------------------------------------------------------------------------------|--|
| Revista Española de Cardiología             | No                                                                                                                                                                                                                                                                                                                                                                                                                                                                                                                                                                                                                                                                                                                                                                                                                                                                                                                                                                                                                                                                                                                                                                                                                                                                                                                                                                                                                                                                                                                                                                                                                                                                                                                                                                                                                                                                                                                                                                                                                                                                                                                                                                                     |  |
| Revista Española de Enfermedades Digestivas | No                                                                                                                                                                                                                                                                                                                                                                                                                                                                                                                                                                                                                                                                                                                                                                                                                                                                                                                                                                                                                                                                                                                                                                                                                                                                                                                                                                                                                                                                                                                                                                                                                                                                                                                                                                                                                                                                                                                                                                                                                                                                                                                                                                                     |  |
| Revista Española de Salud Pública           | No                                                                                                                                                                                                                                                                                                                                                                                                                                                                                                                                                                                                                                                                                                                                                                                                                                                                                                                                                                                                                                                                                                                                                                                                                                                                                                                                                                                                                                                                                                                                                                                                                                                                                                                                                                                                                                                                                                                                                                                                                                                                                                                                                                                     |  |
| Revista Española de Quimioterapia           | No                                                                                                                                                                                                                                                                                                                                                                                                                                                                                                                                                                                                                                                                                                                                                                                                                                                                                                                                                                                                                                                                                                                                                                                                                                                                                                                                                                                                                                                                                                                                                                                                                                                                                                                                                                                                                                                                                                                                                                                                                                                                                                                                                                                     |  |
| Revista de Neurología                       | <p><u>Disponibilidad de datos (Data Sharing)</u></p> <p><i>Revista de Neurología</i>, en su afán de contribuir en la investigación científica, recomienda a los autores que pretendan publicar que todos los artículos que informen sobre resultados de ensayos clínicos contengan una declaración de disponibilidad de datos; esto se extiende a todos los artículos presentados de cualquier índole en torno a la investigación.</p> <p>Compartir los datos sin procesar generados durante el curso de la investigación que han servido para extraer y validar resultados (los datos brutos de la investigación) favorece que la ciencia sea más abierta y accesible, fomentando que estos datos sin procesar puedan reutilizarse y emplearse más allá del fin para el que fueron generados y sirvan a los investigadores para verificar datos de investigación o reutilizarlos para nuevas investigaciones.</p> <p>Para conocer más sobre declaración de datos (data sharing) pueden acceder a estos dos enlaces externos a <i>Revista de Neurología</i></p> <ul style="list-style-type: none"> <li>• Sixto-Costoya A, Aleixandre-Benavent R, Vidal-Infer A, Lucas-Dominguez R, Castello-Cogollos L. Data sharing: qué son y cómo se pueden compartir los datos de investigación. Manual de recomendación para gestores de la información. Madrid: Sociedad Española de Documentación e Información Científica (SEDIC); 2019. URL: <a href="https://www.sedic.es/wp-content/uploads/2020/01/Data_Sharing-DEF.pdf">https://www.sedic.es/wp-content/uploads/2020/01/Data_Sharing-DEF.pdf</a>. Fecha última consulta: 27.07.2022.</li> <li>• Gobierno de España. Ministerio de Asuntos Económicos y Transformación Digital. Hacia el acceso abierto de la información científica en la Unión Europea. Madrid: Gobierno de España. Ministerio de Asuntos Económicos y Transformación Digital; 2016. URL: <a href="https://datos.gob.es/es/noticia/hacia-el-acceso-abierto-de-la-informacion-cientifica-en-la-union-europea">https://datos.gob.es/es/noticia/hacia-el-acceso-abierto-de-la-informacion-cientifica-en-la-union-europea</a>. Fecha última consulta: 27.07.2022.</li> </ul> |  |

C.- Datos individuales de los artículos revisados de las 6 revistas objeto del análisis y de 3 más de 'control'. Datos obtenidos el 5 de enero de 2023.

| tipo                             | autor                     | ref            | Tipo estudio observacional | Mat suplemen | Financiación privada | Compartir datos | Cdl            |
|----------------------------------|---------------------------|----------------|----------------------------|--------------|----------------------|-----------------|----------------|
| <b>Archivos Bronconeumología</b> |                           |                |                            |              |                      |                 |                |
| Original                         | de la Rosa Carrillo et al | 58:11–21       | retrospectivo              | si           |                      |                 |                |
| Original                         | Torrent–Vernetta et al    | 58:22–29       | prospectivo                | si           |                      |                 |                |
| Original                         | Carrasco–Hernandez et al  | 58:30–34       | prospectiivo               |              |                      |                 |                |
| Carta científica                 | Martinez-Martinez M et al | 58: 93–5       | retrospectivo              | si           |                      |                 |                |
| Carta científica                 | Castillo Villejas et al   | 58:99–101      | prospectivo                |              |                      |                 | no se menciona |
| Original                         | Fernandez–Bello et al     | 117–24         | prospectivo                | si           |                      |                 |                |
| Original                         | Romero–Peralta et al      | 125–34         | retrospectivo              | si           | no se menciona       |                 |                |
| Original                         | Bermudo et al             | 135–41         | retrospectivo              | si           |                      |                 |                |
| Original                         | Safont et al              | 58:142–9       | prospectivo                |              |                      | SI              |                |
| Carta científica                 | Díaz–Peña et al           | CHILE 58:177–9 | retrospectivo              | si           |                      |                 |                |

|                          |                          |        |            |                         |               |                |           |                |
|--------------------------|--------------------------|--------|------------|-------------------------|---------------|----------------|-----------|----------------|
| Carta científica         | Barbeta et al            |        | 58:183–7   | prospectivo             | si            |                | SI        |                |
| Carta científica         | Alsina–Restoy et al      |        | 58: 188–90 | retrospectivo           |               |                |           |                |
| Carta científica         | Rudilla et al            |        | 58:191–3   | transversal             |               |                |           | no se menciona |
| Carta científica         | Dias et al               | BRASIL | 58:197–9   | retrospectivo ecologico |               |                |           |                |
| Original                 | Alonso–Fernandez et al   |        | 58:219–27  | prospectivo             | si            |                |           |                |
| Original                 | Masa et al               |        | 58:228–36  | Post–hoc ECC            | si            |                | SI        |                |
| Original                 | Mir–Messa et al          |        | 58:237–45  | prospectivo             | si            |                |           |                |
| Carta científica         | Madrid–Mejia et al       |        | 58:261–3   | prospectivo             |               | no se menciona |           |                |
| Carta científica         | Lopez–Campos et al       |        | 58:264–7   | transversal             |               |                |           |                |
| Carta científica         | Vazquez–Temprano et al   |        | 58:272–4   | transversal             |               | no se menciona |           | no se menciona |
| Carta científica         | Loureiro–Amigo et al     |        | 58:277–80  | retrospectivo           |               |                |           |                |
| Carta científica         | Perez de Llano et al     |        | 58:281–3   | retrospectivo           |               |                | SI        |                |
| Carta científica         | Caballero–Eraso et al    |        | 58:284–6   | encuesta                | si            |                |           |                |
| Original                 | Fernandez–Blazquez et al |        | 58:305–10  | prospectivo             |               | no se menciona |           |                |
| Original                 | Enjo–Barreiro et al      |        | 58:311–22  | prospectivo             |               |                |           |                |
| <b>Atención Primaria</b> |                          |        |            |                         | Mat<br>suplem | Financiación   | Compartir | Cdl            |
| Original                 | Gimenez–Campos et al     |        | 54:102144  | rev sistematica         |               |                |           |                |



|                     |                                |           |           |                           |    |                   |
|---------------------|--------------------------------|-----------|-----------|---------------------------|----|-------------------|
| Original            | Aviles–Martinez et al          |           | 54:102119 | cuasiexperimental         |    |                   |
| Original            | Ozceylan & Altuntas            | TURQUIA   | 54:102146 | transversal               |    |                   |
| Original            | Perez–Milena et al             |           | 54:102156 | retrospectivo (auditoria) |    |                   |
| Original            | Sotorra–Figuerola et al        |           | 54:102157 | retrospectivo             | si |                   |
| Original            | Pascual Lopez et al            |           | 54:102232 | cualitativo Delphi        |    |                   |
| Original            | Velasco Bernal & Trejo–Gabriel |           | 54:102170 | rev sistematica           |    |                   |
| Carta<br>cientifica | Valenzuela Ramos et al         | PERU      | 54:102115 | cuasiexperimental         |    | no se menciona    |
| Carta<br>cientifica | Caparros Boixes et al          |           | 54:102223 | retrospectivo             |    |                   |
| Carta<br>cientifica | Velasco Artaza et al           |           | 54:102191 | cuasiexperimental         |    |                   |
| Original            | Gonzalez Tejon et al           |           | 54:102171 | retrospectivo             |    |                   |
| Original            | Gomez–Carmona et al            |           | 54:102178 | transversal               |    |                   |
| Original            | Mamani–Vilca et al             | PERU      | 54:102194 | validacion escala         |    |                   |
| Original            | Ariel Franco et al             | ARGENTINA | 54:102192 | cualitativo               | si |                   |
| Original            | Hernandez–Ascanio et al        |           | 54:102218 | cualitativo               |    |                   |
| Original            | Gervilla Garcia et al          |           | 54:102230 | validacion escala         |    |                   |
| Carta<br>cientifica | Martin Oliveros et al          |           | 54:102251 | prospectivo               |    |                   |
| Carta               | Moyano et al                   | PERU      | 54:102172 | transversal               |    | no se<br>menciona |
| Carta               | Vivas Maiques et al            |           | 54:102190 | transversal               |    | no se<br>menciona |
| Original            | Rodriguez Donoso et al         |           | 54:102234 | transversal               |    |                   |
| Original            | Nicieza Garcia et al           |           | 54:102261 | retrospectivo             |    |                   |
| Original            | Bandeira & Witt                | BRASIL    | 54:102275 | validacion instrumento    |    | no se menciona    |
| Original            | Llano Señaris et al            |           | 54:102238 | rev sistematica           |    |                   |

|                                                         |                           |           |            |                    |            |                |           |                   |
|---------------------------------------------------------|---------------------------|-----------|------------|--------------------|------------|----------------|-----------|-------------------|
| Original                                                | Barrueco–Otero et al      |           | 54:102236  | prospectivo        |            |                |           |                   |
| Original                                                | Cañaveras Leon et al      |           | 54:102259  | retrospectivo      | si         |                |           |                   |
| <b>Enfermedades Infecciosas y Microbiología Clínica</b> |                           |           |            |                    | Mat suple, | Financiacion   | Compartir | Cdl               |
| Original                                                | Morillo–Verdugo et al     |           | 40:7–13    | transversal        |            |                |           |                   |
| Original                                                | Perez–Olmeda et al        |           | 40:22–7    | diagnostico        |            |                |           |                   |
| Original<br>breve                                       | Costa et al               | PORTUGAL  | 40:28–31   | retrospectivo      |            | no se menciona |           |                   |
| Original<br>breve                                       | Lejarraga–Cañas et al     |           | 40: 32–4   | retrospectivo      |            | no se menciona |           |                   |
| Carta<br>cientifica                                     | Dominguez–Fernandez et al |           | 40: 42–3   | diagnostico        |            | no se menciona |           | no se<br>menciona |
| Original                                                | Brotons et al             |           | 40:53–8    | prospectivo        |            |                |           |                   |
| Original                                                | Villanueva–Bueno et al    |           | 40:59–65   | cualitativo Delphi |            |                |           |                   |
| Original<br>breve                                       | Simo Nebot et al          |           | 40: 78–81  | prospectivo        | si         |                |           |                   |
| Original<br>breve                                       | Viettri et al             | VENEZUELA | 40:82–5    | diagnostico        | si         |                |           |                   |
| Original                                                | Julian–Jimenez et al      |           | 40: 102–12 | prospectivo        | si         |                |           |                   |
| Original                                                | Castillo et al            | COLOMBIA  | 40: 113–20 | transversal        |            |                |           |                   |
| Original                                                | Martin–Carbonero et al    |           | 40:121–4   | retrospectivo      |            | no se menciona |           |                   |
| Original<br>breve                                       | Asensio et al             |           | 40: 125–30 | retrospectivo      |            |                |           |                   |
| Original<br>breve                                       | Gallego–Marquez et al     |           | 40:138–41  | transversal        |            |                |           |                   |
| Carta<br>cientifica                                     | Marco et al               |           | 40:152–4   | diagnostico        |            |                |           | no se<br>menciona |
| Original                                                | Nebreda–Mayoral et al     |           | 40:158–65  | retrospectivo      |            |                |           |                   |
| Original                                                | Lopez–Corbeto et al       |           | 40:166–171 | transversal        |            |                |           |                   |
| Original                                                | Santibañez et al          |           | 40:179–82  | diagnostico        |            |                |           |                   |

|                         |                        |                  |                     |            |              |                |
|-------------------------|------------------------|------------------|---------------------|------------|--------------|----------------|
| Original<br>breve       | Mormeneo Bayo et al    | 40:183–6         | retrospectivo       |            |              | no se menciona |
| Original<br>breve       | Guasch–Ibañez et al    | 40:187–9         | diagnostico         |            |              | no se menciona |
| Original                | Villar–Ortega et al    | 40:224–34        | rev sistematica     |            |              |                |
| Original                | Llorente et al         | 40:235–40        | prospectivo         |            |              |                |
| Original<br>breve       | Diaz–Acedo et al       | 40:258–61        | transversal         |            |              | no se menciona |
| Original                | Agusti et al           | 40:289–95        | prospectivo         | si         |              |                |
| Original                | Navarro–Jimenez et al  | 40:<br>296–301   | retrospectivo       |            |              |                |
| <b>Gaceta Sanitaria</b> |                        |                  |                     | Mat suple, | Financiacion | Compartir Cdl  |
| Original                | Llupia et al           | 36:6–11          | retrospectivo       |            |              | SI             |
| Original                | Larrañaga et al        | 36:12–8          | coste–utilidad      | si         |              |                |
| Original                | Tiscar–Gonzalez et al  | 36:19–24         | cualitativo         |            |              |                |
| Original                | Monteruel et al        | 36:25–31         | cualitativo         |            |              |                |
| Carta                   | Lopez Matons et al     | 36:85–92         | transversal         |            |              |                |
| Original                | Ponjoan et al          | 36:106–10        | transversal         |            |              |                |
| Original                | Herrero–Arias et al    | NORUEGA 36:111–7 | cualitativo         |            |              |                |
| Original                | Llimos et al           | 36:127–38        | transversal         |            |              |                |
| Original                | Prieto Rodriguez et al | 36:139–45        | cualitativo         |            |              |                |
| Original                | Berbegal–Bolsas et al  | 36:146–51        | transversal         |            |              | no se menciona |
| Original<br>breve       | Berbegal–Bolsas et al  | 36:152–5         | Validacion encuesta | si         |              |                |
| Original<br>breve       | Bacigalupe et al       | 36:156–9         | transversal         |            |              |                |
| Original                | Vasquez–Vera et al     | 36:207–13        | transversal         |            |              |                |

|                           |                            |         |            |                              |    |            |                |                   |
|---------------------------|----------------------------|---------|------------|------------------------------|----|------------|----------------|-------------------|
| Original                  | Carmona–Rosado et al       |         | 36:214–20  | transversal                  | si |            |                |                   |
| Original                  | Perez Corral & Danet Danet |         | 36:221–31  | cualitativo                  |    |            |                |                   |
| Original                  | Rodriguez–Eguizabal et al  |         | 36:232–239 | transversal                  | si |            |                |                   |
| Original                  | Perez–Sales et al          | MEXICO  | 36:240–5   | retrospectivo                |    |            |                |                   |
| Original                  | Ibarrondo et al            |         | 36:246–52  | retrospectivo                | si |            |                |                   |
| Original<br>breve         | Benavides et al            |         | 36:253–6   | retrospectivo                |    |            | SI             |                   |
| Original<br>breve         | Pelegri et al              |         | 36: 257–9  | prospectivo                  |    |            |                |                   |
| Original                  | Golpe et al                |         | 36:293–300 | series temporales            |    |            | SI             |                   |
| Original                  | de Juan et al              |         | 36:301–8   | transversal                  |    |            |                |                   |
| Original                  | Diaz–Olalla et al          |         | 36:309–16  | transversal                  | si |            | SI             |                   |
| Original                  | Ruiz–Comellas et al        |         | 36:317–23  | prospectivo                  |    |            |                |                   |
| Original                  | Esteve–Matali et al        |         | 36:324–32  | transversal                  | si |            | SI             |                   |
| <b>Medicina Intensiva</b> |                            |         |            |                              |    | Mat suple, | Financiacion   | Compartir Cdl     |
| Original                  | Escudero et al             |         | 46:1–7     | retrospectivo                |    |            |                |                   |
| Original                  | Llorente et al             |         | 46:8–13    | prospectivo                  |    |            |                |                   |
| Original                  | Catalan–Ibars et al        |         | 46:14–22   | prospectivo                  |    |            |                |                   |
| Original                  | Pasin et al                |         | 46:23–30   | retrospectivo                | si |            |                |                   |
| Carta<br>cientifica       | Salazar Ramirez et al      |         | 46:46–50   | transversal                  |    |            |                |                   |
| Carta<br>cientifica       | Galan et al                |         | 46:53–7    | ECC, resultados<br>españoles |    |            |                |                   |
| Carta<br>cientifica       | Jean–Mitchel et al         | FRANCIA | 46:58–61   | retrospectivo                |    |            | no se menciona | no se<br>menciona |
| Original                  | Paternoster et al          | ITALIA  | 46:65–71   | serie de casos               |    |            | no se menciona |                   |
| Original                  | Cataño–Jaramillo et al     |         | 46:72–80   | rev sistematica              | si |            |                |                   |

|                  |                                |           |            |                    |    |                |                |
|------------------|--------------------------------|-----------|------------|--------------------|----|----------------|----------------|
| Carta científica | Sirvent et al                  |           | 46:94–6    | retrospectivo      |    | no se menciona | no se menciona |
| Carta científica | Keituqwa Yañez et al           |           | 46:96–8    | retrospectivo      |    | no se menciona | no se menciona |
| Carta científica | Huespe et al                   | ARGENTINA | 46:98–101  | cualitativo Delphi |    | SI             |                |
| Carta científica | Ferré et al                    |           | 46:101–3   | prospectivo        | si | no se menciona | no se menciona |
| Carta científica | Martin–Villen et al            |           | 46:103–5   | retrospectivo      |    | no se menciona |                |
| Carta científica | Gonzalez–Castro et al          |           | 46:105–7   | retrospectivo      | si | no se menciona | no se menciona |
| Carta científica | Angel Mejia et al              | COLOMBIA  | 46:107–9   | retrospectivo      |    | no se menciona | no se menciona |
| Original         | Quintana–Díaz et al            |           | 46:123–31  | transversal        | si |                |                |
| Original         | Llorente et al                 |           | 46:132–9   | prospectivo        |    |                |                |
| Carta científica | Concha et al                   |           | 46:161–3   | retrospectivo      |    | no se menciona | no se menciona |
| Carta científica | Raurell–Torredà & Arias–Rivera |           | 46:164–5   | prospectivo        |    |                |                |
| Carta científica | Gonzalez–Castro et al          |           | 46:166–8   | retrospectivo      |    | no se menciona |                |
| Carta científica | Rodríguez–Ruiz et al           |           | 46:169–70  | validacion escala  | si |                |                |
| Original         | Estella et al                  |           | 46:179–91  | prospectivo        | si |                |                |
| Original         | Escudero–Acha et al            |           | 46:192–200 | prospectivo        | si |                |                |
| Carta científica | Martin–Corral et al            |           | 46:221–3   | retrospectivo      | si | no se menciona | no se menciona |

**Revista de Neurologia**

Mat suple, Financiacion Compartir Cdi

|          |                          |          |            |                      |                |                |
|----------|--------------------------|----------|------------|----------------------|----------------|----------------|
| Original | Caso–Gonzalez et al      |          | 74:8–14    | prospectivo          | no se menciona | no se menciona |
| Original | Feler–Moliner et al      |          | 74:15–21   | retrospectivo        | no se menciona | no se menciona |
| Original | Baqué et al              |          | 74:37–47   | prospectivo          | no se menciona | no se menciona |
| Original | Lagarejos–Gonzalez et al |          | 74:48–54   | retrospectivo        | no se menciona | no se menciona |
| Original | Lamas–Perez et al        |          | 74:55–60   | transversal          | no se menciona | no se menciona |
| Original | Garcia–Rudolph et al     |          | 74:69–77   | retrospectivo        | no se menciona | no se menciona |
| Original | Sanchez–Garcia et al     |          | 74:83–92   | rev sistematica      | no se menciona | no se menciona |
| Original | Pitarch–Castellano et al |          | 74:78–82   | validacion de escala | no se menciona | no se menciona |
| Original | Arevalo–Saenz et al      |          | 74:125–34  | retrospectivo        | no se menciona | no se menciona |
| Original | Marin–Gracia et al       |          | 74:117–24  | transversal          | no se menciona | no se menciona |
| Original | Justo–Henriques et al    | RORTUGAL | 74: 107–16 | ECC, reanálisis      | no se menciona | no se menciona |
| Original | Martin–Rios et al        |          | 74:149–55  | prospectivo          | no se menciona | no se menciona |
| Original | Perez–Robledo et al      |          | 74:156–62  | adaptacion escala    | no se menciona | no se menciona |
| Original | Campins–Romeu et al      |          | 74:143–8   | retrospectivo        | no se menciona | no se menciona |
| Original | Salmeron–Medina et al    |          | 74:181–8   | cualitativo          | no se menciona | no se menciona |

|                                                                   |                          |           |            |                      |            |                |                |
|-------------------------------------------------------------------|--------------------------|-----------|------------|----------------------|------------|----------------|----------------|
| Original                                                          | Romero–Bravo et al       |           | 74:189–201 | rev sistematica      |            | no se menciona | no se menciona |
| Original                                                          | Rodriguez–Campello et al |           | 74:175–80  | adaptacion escala    |            | no se menciona | no se menciona |
| Original                                                          | Catalan–Aguilar et al    |           | 74:219–27  | transversal          |            | no se menciona | no se menciona |
| Original                                                          | Labos et al              |           | 74:209–18  | transversal          |            | no se menciona | no se menciona |
| Original corto                                                    | Martinez–Barbero et al   |           | 74:228–31  | retrospectivo        |            | no se menciona | no se menciona |
| Original                                                          | Fernandez–Sanchez et al  |           | 74:245–57  | transversal          |            | no se menciona | no se menciona |
| Original                                                          | Lopez–Hernandez et al    | MEXICO    | 74:258–64  | ambispectivo cohorte |            | no se menciona | no se menciona |
| Original corto                                                    | Garcia–Estevez et al     |           | 74:265–8   | prospectivo          |            | no se menciona | no se menciona |
| Original                                                          | Moreira–Constantin et al | BRASIL    | 74:285–90  | transversal          |            | no se menciona | no se menciona |
| Original                                                          | Pons et al               |           | 74:291–7   | prospectivo          |            | no se menciona | no se menciona |
| <b>Journal of Investigational Allergy and Clinical immunology</b> |                          |           |            |                      | Mat suple, | Financiacion   | Compartir Cdl  |
| Original                                                          | Gaspar et al             | PORTUGAL  | 32:23–32   | prospectivo          |            |                |                |
| Original                                                          | Lima et al               | PORTUGAL  | 32:33–9    | prospectivo          |            |                |                |
| Original                                                          | Abbadessa et al          | ITALIA    | 32:40–7    | prospectivo          |            |                |                |
| Original breve                                                    | Gamez et al              | AUSTRALIA | 32:48–50   | serie temporal       | si         |                |                |
| Original breve                                                    | Haroun–Diaz et al        |           | 32:50–2    | prospectivo          | si         |                |                |
| Original                                                          | Vega–Castro et al        |           | 32:116–23  | prospectivo          | si         |                |                |

|          |                         |          |            |                      |    |
|----------|-------------------------|----------|------------|----------------------|----|
| Original | Nettis et al            | ITALIA   | 32:124–32  | retrospectivo        |    |
| Original | Uriarte et al           |          | 32:133–40  | prospectivo          |    |
| Original |                         |          |            |                      |    |
| breve    | Rodriguez–Vazquez et al |          | 32:143–5   | prospectivo          | si |
| Original |                         |          |            |                      |    |
| breve    | Extremera Ortega et al  |          | 32:146–7   | retrospectivo        | si |
| Original | Gimenez–Arnau et al     |          | 32:191–9   | prospectivo          | si |
| Original | D'Amelio et al          |          | 32:206–12  | prospectivo          | si |
| Original |                         |          |            |                      |    |
| breve    | Davila et al            |          | 32:213–5   | retrospectivo        | si |
| Original |                         |          |            |                      |    |
| breve    | Villalobos–Violan et al |          | 32:216–7   | prospectivo          | si |
| Original |                         |          |            |                      |    |
| breve    | Solano–Solares et al    |          | 32: 218–20 | prospectivo          | si |
| Original |                         |          |            |                      |    |
| breve    | Miralles Lopez et al    |          | 32:220–23  | incierto pros/retros | si |
| Original | Ibañez–Sandin et al     |          | 32:270–81  | prospectivo          | si |
| Original | Casas–Saucedo et al     |          | 32:282–90  | prospectivo          | si |
| Original | Rojas–Lechuga et al     |          | 32:291–8   | validacion prueba    |    |
| Original |                         |          |            |                      |    |
| breve    | Valverde–Monge et al    |          | 32:299–302 | retrospectivo        |    |
| Original |                         |          |            |                      |    |
| breve    | Betancor et al          |          | 32: 301–3  | prospectivo          | si |
| Original | Nuñez–Borque et al      |          | 32:367–74  | prospectivo          |    |
| Original | Roesner et al           | ALEMANIA | 32:383–92  | prospectivo          | si |
| Original |                         |          |            |                      |    |
| breve    | Mera–Berriatua et al    |          | 32:395–8   | prospectivo          | si |
| Original | Ruiz–Leon et al         |          | 32:451–9   | transversal          | si |



|                     |                          |         |            |                |    |                |
|---------------------|--------------------------|---------|------------|----------------|----|----------------|
| Original            | Ribera et al             |         | 75:12–21   | coste–utilidad | si |                |
| Original            | Puig–Jove et al          |         | 75:22–30   | transversal    | si |                |
| Original            | Sicras–Mainar et al      |         | 75:31–8    | retrospectivo  | si |                |
| Original            | Miro et al               |         | 75: 39–49  | retrospectivo  | si |                |
| Original            | Carrillo–Aleman et al    |         | 75:50–9    | prospectivo    |    | no se menciona |
| Original            | Salterain–Gonzalez et al |         | 75:60–6    | retrospectivo  | si |                |
| Carta<br>cientifica | Vazquez Garcia et al     |         | 75:91–3    | prospectivo    |    |                |
| Original            | Tokarek et al            | POLONIA | 75:119–28  | retrospectivo  |    | no se menciona |
| Original            | Gonzalez–Vilchez et al   |         | 75:129–40  | retrospectivo  | si |                |
| Original            | Solla–Buceta et al       |         | 75:141–9   | retrospectivo  |    |                |
| Original            | Ramos–Maqueda et al      |         | 75:166–73  | retrospectivo  |    | no se menciona |
| Carta<br>cientifica | Benito–Gonzalez et al    |         | 75: 179–81 | prospectivo    |    |                |
| Carta<br>cientifica | Sanchis et al            |         | 75:181–2   | retrospectivo  |    |                |
| Carta<br>cientifica | Redondo et al            |         | 75:185–8   | prospectivo    | si |                |
| Original            | Delgado–Arana et al      |         | 75: 213–22 | prospectivo    | si |                |
| Original            | Gabaldon–Perez et al     |         | 75:223–31  | retrospectivo  | si |                |
| Original            | Lamounier Junior et al   |         | 75:242–50  | prospectivo    | si |                |
| Original            | Cabrera–Rubio et al      |         | 75:251–60  | retrospectivo  | si | no se menciona |
| Carta<br>cientifica | Barrio–Collado et al     |         | 75:266–9   | transversal    |    |                |
| Carta<br>cientifica | Anguita et al            |         | 75:273–5   | retrospectivo  |    |                |
| Original            | Hernandez–Vaquero et al  |         | 75:294–9   | retrospectivo  | si |                |
| Original            | de Bont et al            |         | 75:300–7   | retrospectivo  | si |                |
| Original            | Alonso–Pedrero et al     |         | 75:308–15  | transversal    | si |                |

|                         |                          |          |            |                         |            |                |           |          |
|-------------------------|--------------------------|----------|------------|-------------------------|------------|----------------|-----------|----------|
| Original                | Nuñez et al              |          | 75:316–24  | retrospectivo           | si         |                |           |          |
| Original                | Pinar et al              |          | 75:325–33  | coste–efectividad       |            |                |           |          |
| <b>Medicina Clínica</b> |                          |          |            |                         | Mat suple, | Financiacion   | Compartir | Cdl      |
| Original                | De–Las–Casa–Camara et al |          | 158:1–6    | cuasiexperimental       |            |                |           |          |
| Original                | Guisado–Gil et al        |          | 158:7–12   | adaptacion cuestionario |            | no se menciona |           |          |
| Original                | Guisado–Espartero et al  |          | 158:13–9   | prospectivo             |            | no se menciona |           |          |
| Original                |                          |          |            |                         |            |                |           |          |
| breve                   | Camilo Motta et al       | COLOMBIA | 158:20–3   | retrospectivo           | si         |                |           |          |
| Carta                   |                          |          |            |                         |            |                |           |          |
| cientifica              | Torne Cachot et al       |          | 158:35–6   | retrospectivo           |            | no se menciona |           |          |
| Carta                   |                          |          |            |                         |            |                |           | no se    |
| cientifica              | Arevalos et al           |          | 158:41–2   | retrospectivo           |            |                |           | menciona |
| Original                | Perez–Rodrigo et al      |          | 158:49–57  | transversal             |            |                |           |          |
| Original                | Tejerina Alvarez et al   |          | 158: 58–64 | prospectivo             | si         | no se menciona |           |          |
| Original                | Lopez Zubizarreta et al  |          | 158:65–9   | retrospectivo           |            | no se menciona |           |          |
| Original                | Lin & Ni                 | CHINA    | 158:70–2   | retrospectivo           |            |                |           |          |
| Carta                   |                          |          |            |                         |            |                |           | no se    |
| cientifica              | Supervia et al           |          | 158:90–1   | prospectivo             |            | no se menciona |           | menciona |
| Carta                   |                          |          |            |                         |            |                |           | no se    |
| cientifica              | Callejas Rubio et al     |          | 158:91–2   | retrospectivo           |            | no se menciona |           | menciona |
| Carta                   |                          |          |            |                         |            |                |           | no se    |
| cientifica              | Layos–Romero et al       |          | 158:96–7   | retrospectivo           |            | no se menciona |           | menciona |
| Original                | Celik et al              | TURQUIA  | 158:99–104 | retrospectivo           |            |                |           |          |
| Original                | Nicolau et al            |          | 158:105–10 | prospectivo             |            | no se menciona |           |          |
| Original                | Crespo–Fresno et al      |          | 158:111–7  | prospectivo             | si         | no se menciona |           |          |
| Carta                   |                          |          |            |                         |            |                |           | no se    |
| cientifica              | Rivas Prado et al        |          | 158:137–8  | retrsopectivo           |            | no se menciona |           | menciona |
| Carta                   |                          |          |            |                         |            |                |           |          |
| cientifica              | Serra Mitja et al        |          | 158:138–9  | retrospectivo           |            | no se menciona |           |          |

|                     |                       |            |                 |    |                |                   |
|---------------------|-----------------------|------------|-----------------|----|----------------|-------------------|
| Original            | Pujante Alarcon et al | 158:153–8  | retrospectivo   |    |                |                   |
| Original            | Rello et al           | 158:159–66 | rev sistematica |    |                |                   |
| Original            | Grau Amoros et al     | 158:167–72 | retrospectivo   | si | no se menciona |                   |
| Original<br>breve   | Perez–Belmonte et al  | 158:173–7  | retrospectivo   |    |                |                   |
| Carta<br>cientifica | Valero–Martinez et al | 158:186–7  | retrospectivo   |    | no se menciona | no se<br>menciona |
| Carta<br>cientifica | Guerrero–Diaz et al   | 158:187–8  | transversal     |    | no se menciona | no se<br>menciona |
| Carta<br>cientifica | Aguila Girtido et al  | 158:196–7  | prospectivo     |    |                |                   |
