# Supplementary material
Source: Elsevier journal article supplement (https://www.sciencedirect.com/science/article/pii/S0300289623000285)
Supplement: mmc2 [file S0300289623000285:mmc2.pdf]

## **CARTA CIENTÍFICA**

**Los investigadores olvidan informar sobre cómo compartir los datos de los estudios  
publicados en revistas españolas de medicina**

Rafael Dal-Ré

Unidad de Epidemiología, Instituto de Investigación Sanitaria-Hospital Universitario Fundación

Jiménez Díaz, Universidad Autónoma de Madrid, Madrid, España

Correo electrónico: [rafael.dalre@quironsalud.es](mailto:rafael.dalre@quironsalud.es)

El Comité Internacional de Directores de Revista Médicas (ICMJE) lleva décadas publicando periódicamente unas 'Recomendaciones para la conducción, comunicación, edición y publicación del trabajo académico en las revistas médicas', que marcan el camino a seguir por muchas revistas de medicina, y de otras disciplinas<sup>1</sup>. Actualmente hay varios miles de revistas que se han adherido a estas 'Recomendaciones' y como tales aparecen en el listado del portal del ICMJE. Ahora bien, el hecho de aparecer en ese listado no presupone la obligación de cumplir con todas las recomendaciones<sup>2,3</sup>.

Hace tiempo se informaba en esta revista el cambio de opinión que el ICMJE tuvo cuando, tras anunciar en 2016 una propuesta que obligaría a los investigadores de ensayos clínicos a ceder a terceros los datos individualizados anonimizados de los participantes, en 2017 decidió que la cesión sería voluntaria<sup>4</sup>. Esta noticia tenía un precedente que se había incluido en la 'Recomendaciones' unos años antes. Esta tiene que ver con que algunos directores de revistas *'solicitan que los autores de un artículo deben informar sobre si los datos del estudio están disponibles para terceros para verlos y/o usarlos y/o reanalizarlos, mientras todavía otros animan o requieren que los autores compartan sus datos para su revisión o reanálisis'*<sup>1</sup>. Sería importante conocer qué revistas españolas han incluido este requerimiento en sus 'Instrucciones para los autores' y si estos lo cumplen.

Se han revisado los portales de 24 revistas españolas con un factor de impacto >1, al entender que tienen mayor influencia que las que tienen un factor de impacto ≤1 y de las que carecen de él. De estas 24, 14 están incluidas en el listado de las Recomendaciones del ICMJE (Material suplementario—A). De éstas, sólo cinco (Archivos de Bronconeumología, Atención Primaria, Enfermedades Infecciosas y Microbiología Clínica, Gaceta Sanitaria y Medicina Intensiva), incluyen un apartado específico —denominado aquí *'depósito y enlace de datos'*— en el que se recomienda, apoya o anima, a que los autores compartan los datos crudos de sus estudios con otros investigadores, e informan cómo hacerlo. Una sexta, la Revista de Neurología,

recomienda este proceder sólo para los ensayos clínicos (Material suplementario–B). Para saber si el requerimiento de informar de cómo compartir los datos se cumple con una frecuencia similar a la de otros requerimientos solicitados por las mismas revistas, se han elegido dos requerimientos de control: informar sobre los conflictos de intereses y de la financiación del estudio –que se incluyeron en la Recomendaciones mucho antes–. Además, es de interés saber si se permite incluir material suplementario *online*, que en ocasiones sirve para incluir los datos crudos del estudio.

De las seis revistas se han revisado todos los artículos publicados desde el primer número de 2022 hasta totalizar los primeros 25. Se han incluido en el análisis los estudios de cualquier diseño con mayor facilidad de aplicación a la salud de las personas: los realizados con seres humanos, sus datos, opiniones o materiales. Se han excluido los estudios *in vitro*, en animales, modelos matemáticos y los que describían hasta 5 casos. De todos ellos se registraron los cuatro requisitos antes señalados, el tipo de artículo y el país de trabajo del primer autor. Para saber si alguna revista que, a pesar de no requerir un apartado sobre el '*depósito y enlace de datos*' incluye tal información en algún artículo, se revisaron los 25 primeros artículos de 2022 de las tres revistas incluidas en el listado de las Recomendaciones con más alto factor de impacto: Revista Española de Cardiología, Journal of Investigational Allergology & Clinical Immunology y Medicina Clínica.

Los resultados muestran (Tabla-1) que a) de los 150 artículos estudiados en las seis revistas objeto del análisis, sólo 10 (7%) –pertenecientes a tres revistas– incluyen un apartado sobre '*depósito y enlace de datos*'; b) la Revista de Neurología no informa de ninguna de las variables analizadas; c) los conflictos de intereses se declaran algo más que las fuentes de financiación y ambos en una alta proporción, excepto en Medicina Intensiva; d) una minoría de artículos se acompañan de material suplementario; y, e) la variedad de disciplinas de las que se ocupan las revistas analizadas, ha facilitado la publicación de estudios de todo tipo aunque la mayoría

(78%, 117/150) de los estudios son de tipo observacional, y solo tres artículos hacían referencia a ensayos clínicos. En los 75 artículos revisados de las tres revistas de control no se encontró ninguno que incluyese un apartado sobre '*depósito y enlace de datos*'. La Revista Española de Cardiología y Journal of Investigational Allergology & Clinical Immunology tuvieron un altísimo porcentaje de cumplimiento en la declaración de conflictos de intereses y fuentes de financiación (Material suplementario—C).

Este análisis muestra que son muy pocas las revistas de medicina españolas de prestigio que solicitan a los autores que pongan a disposición de terceros los datos crudos de sus estudios. Más preocupante es que entre las pocas que lo solicitan, las hay que han publicado recientemente 25 artículos sin que ni uno solo de ellos haya puesto sus datos a disposición de otros investigadores. Y entre las revistas que sí recomiendan hacerlo, solo una minoría de los artículos informan a los lectores interesados cómo proceder para tener acceso a ellos. Por los ejemplos que se muestran en la Tabla-2, hay muchas maneras de informar a este respecto. Tan solo hay un caso (Tabla-2—Huespe et al) en el que los autores informaban de que los datos se incluían en el material suplementario...que no se incluyó en el artículo. Obsérvese que entre los ejemplos de artículos que sí informan de cómo tener acceso a los datos científicos del estudio, hay fuentes de financiación pública, privada e incluso sin financiación. El hecho de que el estudio esté financiado por fondos públicos (vg, FEDER, gobiernos autonómicos) no parece obligar a los investigadores a compartir los datos, ya que entre los artículos revisados los hay que no informaron al lector interesado de cómo acceder a aquellos.

La mayor limitación de este análisis radica en el reducido número de revistas que integran la muestra que se ha estudiado. Para completarlo, la muestra debería incluir también revistas con un factor de impacto menor de 1 y quizás, incluso, a las que todavía no lo tienen asignado. Aunque este análisis ha incluido un número muy limitado de artículos, hay que sugerir que las revistas deberían hacer un esfuerzo para que los artículos que publican cumplan los requisitos

que ellas mismas se autoimponen. Si hay revistas como Journal of Investigational Allergology & Clinical Immunology y Gaceta Sanitaria cuyos artículos revisados cumplen con las declaraciones de conflictos de intereses y de las fuentes de financiación al 100% o al 98%, respectivamente, es difícil entender por qué no ocurre esto con el '*depósito y enlace de datos*'. En el extremo opuesto, la situación de Revista de Neurología es sorprendente y pudiera explicarse porque el equipo editorial haya decidido no informar de ninguno de los requerimientos analizados en este trabajo.

Compartir los datos crudos promueve el conocimiento médico<sup>5</sup>. Compartir los datos de estudios cuantitativos es mucho más fácil que de estudios cualitativos. Investigadores de estos últimos esgrimen con frecuencia la falta de autorización de los participantes, la naturaleza sensible de los datos y la pérdida de confianza para no compartir los datos<sup>6</sup>. Sin embargo, los estudios cualitativos son la excepción entre las publicaciones españolas de medicina . Ya en 2011 una mayoría de investigadores compartían sus datos, aunque a más de un tercio les costaba facilitarlos<sup>7</sup>; en el caso de los ensayos clínicos, recientemente se ha constatado que no es fácil acceder a los datos que los autores se comprometieron a compartir<sup>8</sup>. Sería deseable que las revistas españolas de medicina requiriesen que los autores informasen acerca de cómo compartir los datos en todos los artículos que publican, y si no pudieran compartirlos, que así lo informasen.

## Referencias

- 1.- ICMJE. Recommendations for the Conduct, Reporting, Editing, and Publication of Scholarly Work in Medical Journals. Updated May 2022. <https://www.icmje.org/icmje-recommendations.pdf>
- 2.- Dal-Ré R. Transparencia de las revistas españolas de medicina hacia sus lectores y autores. *An Pediatr* 2019, 91: 67-70
- 3.- Siebert M, Gaba JF, Caquelin L, Gouraud H, Dupuy A, Moher D et al. Data-sharing recommendations in biomedical journals and randomized controlled trials: an audit of journals following the ICMJE recommendations. *BMJ Open* 2020;10:e038887.
- 4.-Dal-Ré R. Acceso a los datos individuales anonimizados de los participantes en los ensayos clínicos: el cambio radical de opinión de las revistas médicas de mayor prestigio. *Arch Bronconeumol* 2018, 54: 65-7
- 5.- Flanagin A, Curfman G, Bibbins-Domingo K. Data sharing and the growth of medical knowledge. *JAMA* 2022;328: 2398-9
- 6.- Mozersky J, McIntosh T, Walsh HA, Parsons MV, Goodman M, DuBois JM. Barriers and facilitators to qualitative data sharing in the United States: A survey of qualitative researchers. *PLoS ONE* 2021, 16: e0261719.
- 7.- Tenopir C, Allard S, Douglass K, Aydinoglu AU, Wu L, Read E et al. Data Sharing by Scientists: Practices and Perceptions. *PLoS ONE* 2011, 6: e21101.
- 8.- Danchev V, Min Y, Borghi J, Baiocchi M, Ioannidis JPA. Evaluation of Data Sharing After Implementation of the International Committee of Medical Journal Editors Data Sharing Statement Requirement. *JAMA Netw Open* 2021, 4: e 2033972

**Tabla–1.-** Tipo de artículos, número de artículos que informan de las variables analizadas y del diseño de los estudios incluidos en los 150 artículos analizados de las seis revistas españolas estudiadas (los primeros 25 artículos publicados en 2022 de cada revista)

|                                                                                                                              | <b>Archivos de Bronco-neumología</b> | <b>Atención Primaria</b>                | <b>Enfermedades Infecciosas y Microbiología Clínica</b> | <b>Gaceta Sanitaria</b> | <b>Medicina Intensiva</b>                 | <b>Revista de Neurología</b>  |
|------------------------------------------------------------------------------------------------------------------------------|--------------------------------------|-----------------------------------------|---------------------------------------------------------|-------------------------|-------------------------------------------|-------------------------------|
| <i>A.-Tipo de artículo y origen: número</i>                                                                                  |                                      |                                         |                                                         |                         |                                           |                               |
| Original <sup>a</sup>                                                                                                        | 12                                   | 19                                      | 23                                                      | 24                      | 10                                        | 25                            |
| Carta científica <sup>b</sup>                                                                                                | 13                                   | 6                                       | 2                                                       | 1                       | 15                                        | 0                             |
| Origen <sup>c</sup>                                                                                                          | 2 (Brasil y Chile)                   | 6 (Perú 3, Argentina, Brasil y Turquía) | 3 (Colombia, Portugal y Venezuela)                      | 2 (México y Noruega)    | 4 (Argentina, Colombia, Francia e Italia) | 3 (Brasil, México y Portugal) |
| <i>B.- Artículos que informan de (número)</i>                                                                                |                                      |                                         |                                                         |                         |                                           |                               |
| Conflictos de intereses <sup>d</sup>                                                                                         | 22                                   | 24                                      | 23                                                      | 24                      | 17                                        | 0                             |
| Depósito y enlace de datos <sup>d</sup>                                                                                      | 4                                    | 0                                       | 0                                                       | 5                       | 1                                         | 0                             |
| Fuentes de financiación <sup>d e</sup>                                                                                       | 21                                   | 23                                      | 18                                                      | 25                      | 14                                        | 0                             |
| Artículos que incluyen material suplementario online: número <sup>f</sup>                                                    |                                      |                                         |                                                         |                         |                                           |                               |
|                                                                                                                              | 12                                   | 3                                       | 4                                                       | 7                       | 9                                         | 0                             |
| <i>C. Diseño de los estudios</i>                                                                                             |                                      |                                         |                                                         |                         |                                           |                               |
| C.1.-Estudios observacionales (auditoría, base de datos/registros, cohortes, casos-controles, ecológicos, encuestas): número |                                      |                                         |                                                         |                         |                                           |                               |
| Prospectivos                                                                                                                 | 11                                   | 2                                       | 5                                                       | 2                       | 7                                         | 5                             |
| Retrospectivos                                                                                                               | 9                                    | 6                                       | 7                                                       | 4                       | 11                                        | 6                             |
| Transversales                                                                                                                | 4                                    | 5                                       | 5                                                       | 11                      | 2                                         | 6                             |
| Otros                                                                                                                        | 0                                    | 0                                       | 6 (diagnóstico)                                         | 1 (series temporales)   | 1 (serie de casos)                        | 1 (cohorte ambispectiva)      |
| C.2.-Estudios experimentales (ensayos clínicos): número                                                                      |                                      |                                         |                                                         |                         |                                           |                               |
|                                                                                                                              | 1 (análisis <i>post-hoc</i> )        | 0                                       | 0                                                       | 0                       | 1 (resultados de centros españoles)       | 1 (reanálisis)                |

|                                                                               |   |   |   |   |   |   |
|-------------------------------------------------------------------------------|---|---|---|---|---|---|
| C.3.-Estudios cuasiexperimentales                                             |   |   |   |   |   |   |
|                                                                               | 0 | 3 | 0 | 0 | 0 | 0 |
| C.4.-Adaptación y validación de cuestionarios, escalas e instrumentos: número |   |   |   |   |   |   |
|                                                                               |   | 3 | 0 | 1 | 1 | 3 |
| C.5.-Estudios cualitativos: número                                            |   |   |   |   |   |   |
| Delphi                                                                        | 0 | 1 | 1 | 0 | 1 | 0 |
| Grupos focales/talleres                                                       | 0 | 2 | 0 | 5 | 0 | 1 |
| C.6.-Revisiones sistemáticas: número                                          |   |   |   |   |   |   |
|                                                                               | 0 | 3 | 1 | 0 | 1 | 2 |
| C.7.-Estudios de economía de la salud: número                                 |   |   |   |   |   |   |
|                                                                               | 0 | 0 | 0 | 1 | 0 | 0 |

- (a) Incluye original breve; (b) Incluye tres ‘cartas’ que informaban sobre resultados de estudios; (c) Sólo se señala el país extranjero en donde trabajó el primer firmante. (d) Las seis revistas señalan que los autores tienen que declarar el depósito y enlace de datos, –para que otros investigadores puedan usarlos–, e informar sobre los conflictos de intereses y las fuentes de financiación; (e) Se indica su declaración, pero sin tener en cuenta cuando la financiación sólo permitió publicar el artículo en abierto; (f) Todas permiten incluir material suplementario online, excepto la Revista de Neurología;



**Tabla–2.-** Artículos que incluyeron información sobre cómo compartir los datos crudos del estudio con terceros.

| Referencia                                                  | Fuente de financiación                                 | Depósito y enlace de datos (texto)                                                                                                                                                                                                                                                                                                                                                                                                                                                                                                                            |
|-------------------------------------------------------------|--------------------------------------------------------|---------------------------------------------------------------------------------------------------------------------------------------------------------------------------------------------------------------------------------------------------------------------------------------------------------------------------------------------------------------------------------------------------------------------------------------------------------------------------------------------------------------------------------------------------------------|
| Safont et al. Arch Bronconeumol 2022, 58: 142-9             | Pública: ISCIII                                        | <u>Data sharing</u> De-identified clinical data might be made available to other investigators after approval by the institutional review board, when all follow-up studies are finished as we have investigations for COVID-19 in progress.                                                                                                                                                                                                                                                                                                                  |
| Benavides et al. Gac Sanit 2022, 36: 253-6                  | Pública: ISCIII                                        | <u>Disponibilidad de bases de datos y material para réplica</u> Los datos están a disposición de las personas que lo soliciten al autor principal de este artículo, F.G. Benavides (fernando.benavides@upf.edu), o al Centro de Investigación en Salud Laboral (CiSAL) de la Universidad Pompeu Fabra (cisal@upf.edu).                                                                                                                                                                                                                                        |
| Esteve-Matali et al. Gac Sanit 2022, 36: 324-32             | Pública: ISCIII y Fondo Europeo de Desarrollo Regional | <u>Disponibilidad de datos</u> Todos los datos en que se basa este artículo pueden encontrarse en el repositorio del proyecto COORDENA-CAT. Las personas investigadoras interesadas pueden obtener los datos contactando con Ingrid Vargas por correo electrónico: ivargas@consorci.org (Servei d’Estudis i Prospectives en Polítiques de Salut, Grup de Recerca en Polítiques de Salut i Serveis Sanitaris, Consorci de Salut i Social de Catalunya)                                                                                                         |
| Barbera te al. Arch Bronconeumol 2022, 58: 183-7            | Pública: CIBERES                                       | <u>Availability of data and material</u> The datasets used and/or analyzed during the current study are available from the corresponding author on reasonable request.                                                                                                                                                                                                                                                                                                                                                                                        |
| Llupia et al. Gac Sanitar 2022, 36: 6-11                    | Pública: MINECO-FEDER                                  | <u>Availability of databases and materials</u> The data that support the findings of this study are available on request from the corresponding author. The data are not publicly available due to privacy restrictions                                                                                                                                                                                                                                                                                                                                       |
| Masa et al. Arch Bronconeumol 2022, 58: 228-36 <sup>a</sup> | Público/Privada: ISCIII, FEPAR y Air Liquide           | <u>Data sharing statement</u> (...) Deidentified patients’ data can be requested by researchers for use in independent scientific research and will be provided following review and approval of the research proposal (including statistical analysis plan) and completion of a data sharing agreement with the Pickwick Project Publications Committee. Investigator Data requests can be made anytime from 1 to 2 years after the publication of this trial. Requests should be sent to the corresponding author (Dr. Juan Fernando Masa – fmasa@separ.es) |
| Perez de Llano et al. Arch Bronconeumol 2022, 58: 281-3     | Privada: FAES                                          | <u>Availability of data and material (data transparency)</u> The database could be available upon reasonable request.                                                                                                                                                                                                                                                                                                                                                                                                                                         |
| Diaz-Olalla et al. Gac Sanitar 2022, 36: 309-16             | No financiado                                          | <u>Disponibilidad de bases de datos y material para réplica</u> En los Apéndices <i>on-line</i> se encuentran el número de defunciones y las cifras de población por edades y sexos para la ciudad de Madrid en 2020 trasladadas a las dos tablas de mortalidad correspondientes                                                                                                                                                                                                                                                                              |

|                                              |               |                                                                                                                                                                                                                                                                                                                                                                                                                                                                                                    |
|----------------------------------------------|---------------|----------------------------------------------------------------------------------------------------------------------------------------------------------------------------------------------------------------------------------------------------------------------------------------------------------------------------------------------------------------------------------------------------------------------------------------------------------------------------------------------------|
|                                              |               | (Apéndice D <i>on-line</i> ). Los datos de defunciones de 2020 proceden de las bajas por tal motivo registradas en el Padrón Municipal de Habitantes, que fueron publicadas el 25 de junio de 2021 tanto para la ciudad como para los distritos ( <a href="http://tiny.cc/yyiauz">http://tiny.cc/yyiauz</a> ). Los datos que se incorporan como variables independientes se muestran en el Apéndice A <i>on-line</i> y están publicados en la web de Estadística Municipal de la ciudad de Madrid. |
| Golpe et al. Gac Sanitar 2022, 36: 293-300   | No financiado | <u>Data and code availability statement</u> Public data deposited at the following URL has been used: <a href="https://www.hacienda.gob.es/es-ES/Areas%20Tematicas/CMTabacos/Paginas/EstadisticassobreelMercadodeTabacos.aspx">https://www.hacienda.gob.es/es-ES/Areas%20Tematicas/CMTabacos/Paginas/EstadisticassobreelMercadodeTabacos.aspx</a> . The data has been pre-processed and the dataset and the code used is available to editors, reviewers, and other researchers upon request.      |
| Huespe et al. Med Intensiva 2022, 46: 98-101 | No financiado | <u>Data availability statement</u> All relevant data are within the manuscript and its supporting <sup>b</sup>                                                                                                                                                                                                                                                                                                                                                                                     |

(a) Este artículo informa los resultados de un análisis *post hoc* de un ensayo clínico; (b) Se observará que la frase está sin concluir. Además, a este trabajo no le acompañaba material suplementario alguno, como indica la frase. En consecuencia, el lector interesado carece del acceso a la información que se supone los autores pretendían poner a su disposición. Este es un trabajo realizado en Argentina y el único de autores extranjeros incluidos en esta tabla.

CIBERES: Centro de Investigación Biomédica en Red Enfermedades Respiratorias; FAES: es una compañía farmacéutica española; FEDER: Fondos de la Unión Europea; ISCIII: Instituto de Salud Carlos III; MINECO: Ministerio de Asuntos Económicos y Transformación Digital.
